# Supplementary material for: Fully edible biofuel cells
Source: Royal Society of Chemistry journal article supplement (doi:10.1039/c8tb00497h), 2018-01-01
Supplement: c8tb00497h1.pdf [file c8tb00497h1.pdf]

## Electronic Supplementary Information (ESI)

### Fully Edible Biofuel Cells

Itthipon Jeerapan, Bianca Ciui, Ian Martin, Cecilia Cristea, Robert Sandulescu, Joseph Wang\*

\*E-mail: josephwang@eng.ucsd.edu; Tel: +1 (858) 246 0128

#### Electrode compositions

##### Edible electrodes

The edible mushroom/olive oil/charcoal bioanode was prepared by thoroughly grinding 250 mg of the pre-concentrated mushroom extract, 67  $\mu\text{L}$  of olive oil, and 250 mg of dietary charcoal in an agate mortar. The resulting homogenous paste was packed into the support cavity to obtain a workable electrode. Similarly, edible mushroom/corn oil/charcoal and mushroom/sesame oil/charcoal anodes were prepared, but the olive oil was replaced by corn and sesame oils, respectively. In addition, the edible apple/olive oil/charcoal biocathode was prepared by thoroughly mixing 250 mg of the pre-concentrated apple extract, 67  $\mu\text{L}$  of olive oil, and 250 mg of dietary charcoal in an agate mortar. Similarly, the edible apple/corn oil/charcoal and apple/sesame oil/charcoal cathodes were prepared, but the olive oil was replaced by corn and sesame oils, respectively. The edible plum/olive oil/charcoal and banana/olive oil/charcoal cathodes were also prepared in a similar process as the composition for the edible apple/olive oil/charcoal biocathode, but the apple solution was replaced by plum and banana solutions, respectively. Moreover, the control edible electrode without the tissue extracts was prepared in a similar process by using the homogeneous paste consisting of 250 mg of dietary charcoal and 200  $\mu\text{L}$  of olive oil.

##### Non-edible electrodes

The non-edible alcohol oxidase (AOx)/tetrathiafulvalene (TTF)/mineral oil/graphite anode was prepared by thoroughly mixing 80  $\mu\text{L}$  of five-fold-diluted AOx solution, 40 mg of TTF, 150  $\mu\text{L}$  of mineral oil, and 250 mg of graphite in an agate mortar. The resulting homogenous paste was then packed into the support cavity to obtain a workable electrode. The non-edible AOx/mineral oil/graphite without TTF was also prepared in a similar process, but TTF was not added. In addition, the non-edible  $\text{Ag}_2\text{O}$ /Nafion<sup>®</sup>/graphite cathode was prepared by the following. Graphite/ $\text{Ag}_2\text{O}$  mixture was prepared by thoroughly grinding graphite with  $\text{Ag}_2\text{O}$  powder (2:3 wt. ratio) in an agate mortar. The cathode paste was obtained by mixing 250 mg graphite/ $\text{Ag}_2\text{O}$  composite with 900  $\mu\text{L}$  of a 2 wt% Nafion in ethanol to obtain a homogeneous composite material.

The homogenous paste was then packed into the support to obtain the non-edible  $\text{Ag}_2\text{O}/\text{Nafion}^{\text{®}}/\text{graphite}$  cathode.
